# Supplementary material
Source: publisher figshare collection journal article supplement (https://karger.figshare.com/ndownloader/files/14687368)
Supplement: Supplementary file 1 [file 14687368]

*Note.* -2LL = -2 log likelihood; AIC = Akaike information criterion; BIC = Bayesian information criterion; D = difference statistic;

* p < .001

a Best fitting model.
